# Supplementary material for: Nitrogen-Doped Carbon Flowers with Fe and Ni Dual Metal Centers for Effective Electroreduction of Oxygen
Source: MDPI journal article supplement (doi:10.3390/inorganics10030036), 2022-03-11
Supplement: s1 [file s1]

# **Nitrogen-doped carbon flowers with Fe and Ni dual metal centers for effective electroreduction of oxygen in alkaline media**

Rene Mercado, Forrest Nichols, and Shaowei Chen\*

Department of Chemistry and Biochemistry, University of California, 1156 High Street, Santa Cruz, California 95064, United States. \* E-mail: shaowei@ucsc.edu

**Table S1. Elemental compositions of the sample series from XPS measurements.**

| Sample      | C    | N    | Fe   | Ni    | O    | Metal % | Fe/Ni Ratio |
|-------------|------|------|------|-------|------|---------|-------------|
| NCF         | 90.1 | 6.2  |      | -     | 3.70 |         | -           |
| Fe-NCF      | 92.2 | 2.28 | 0.15 | -     | -    | 0.15    | -           |
| FeNi-NCF(1) | 90.6 | 2.21 | 0.13 | 0.13  | 6.97 | 0.26    | 1.0         |
| FeNi-NCF(2) | 89.5 | 4.09 | 0.18 | 0.091 | 6.10 | 0.27    | 2.0         |
| FeNi-NCF(3) | 91.3 | 4.10 | 0.17 | 0.049 | 4.41 | 0.22    | 3.5         |

**Table S2. Binding energies of Fe and Ni in the sample series from XPS measurements.**

| Sample      | Fe (B.E.) | Ni (B.E) |
|-------------|-----------|----------|
| NCF         | -         | -        |
| Fe-C        | 710.11    | -        |
| FeNi-NCF(1) | 710.43    | 854.45   |
| FeNi-NCF(2) | 710.11    | 854.61   |
| FeNi-NCF(3) | 709.58    | 854.69   |

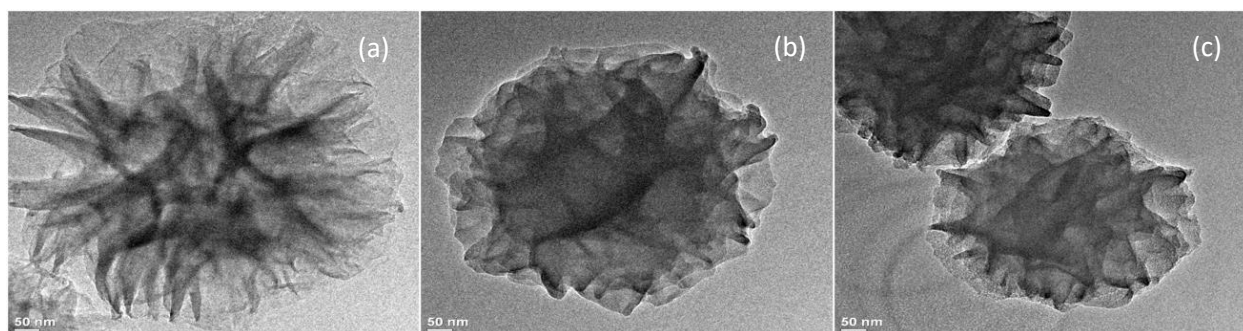

**Figure S1.** TEM images of (a) PACN-70, (b) PACN-230, and (c) NCF.

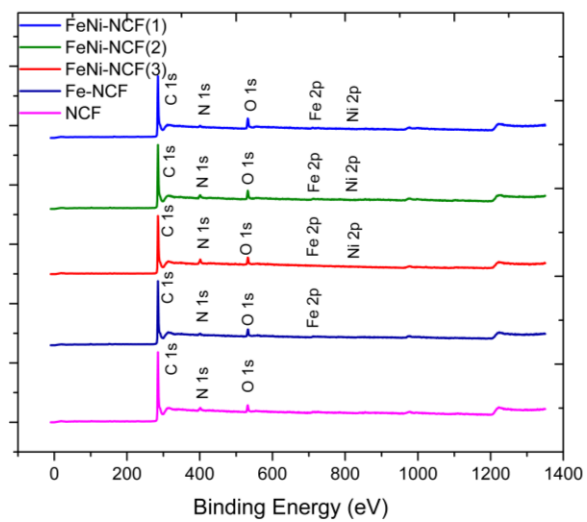

**Figure S2.** XPS survey spectra of FeNi-NCF(1), FeNi-NCF(2), FeNi-NCF(3), and NCF.

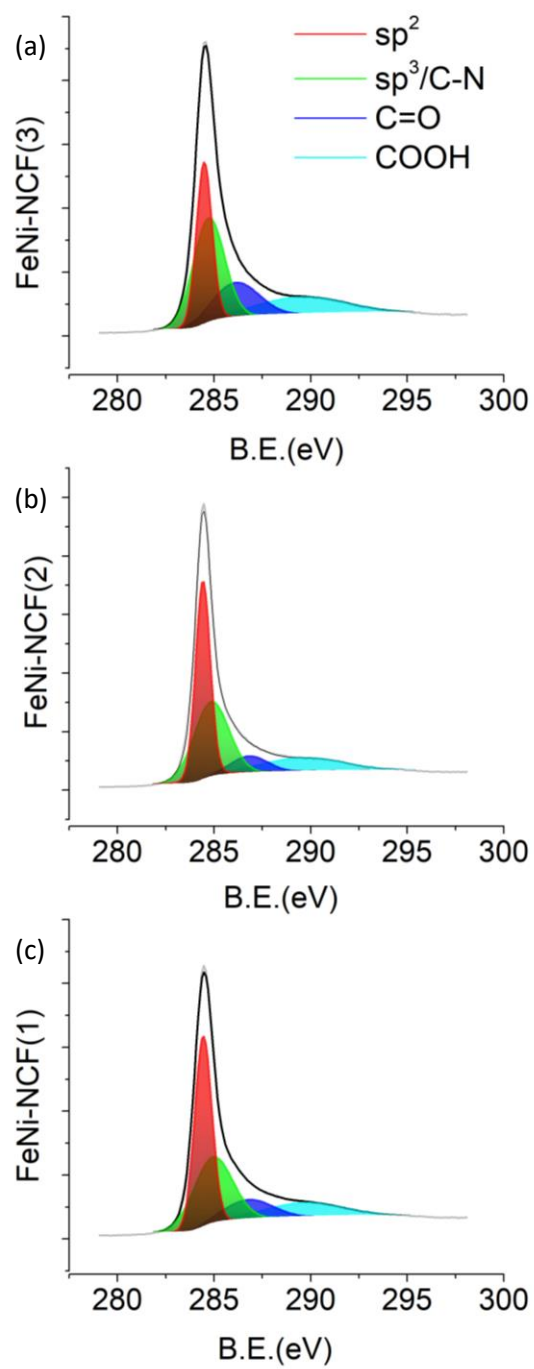

**Figure S3.** High-resolution C 1s spectra of the series of FeNi-NCF samples.

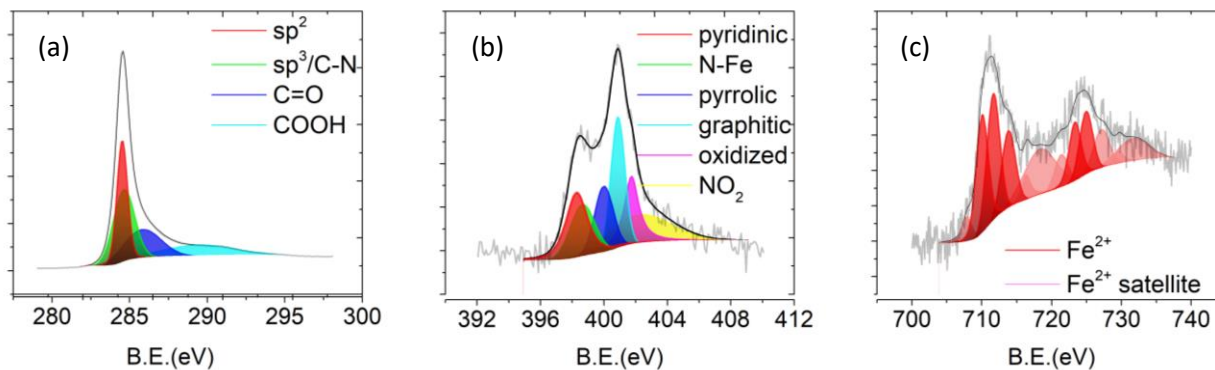

**Figure S4.** High-resolution scans of the (a) C 1s, (b) N 1s, and (c) Fe 2p electrons of Fe-NCF.

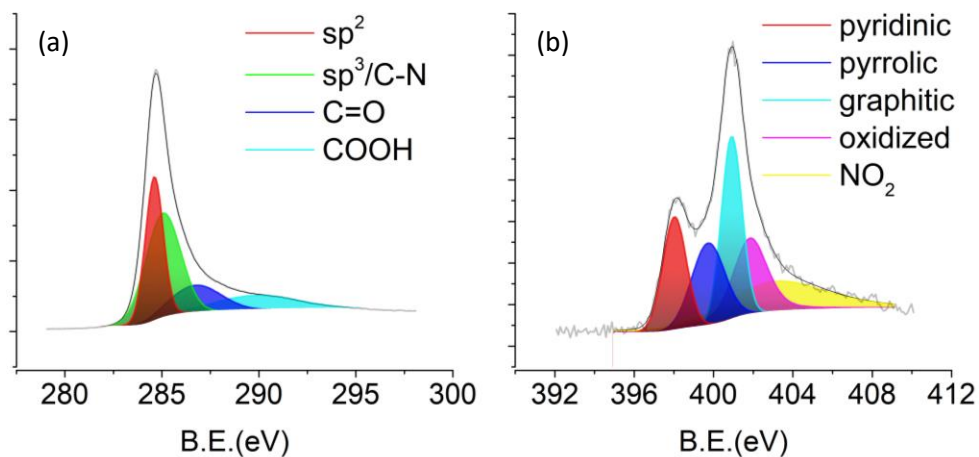

**Figure S5.** High-resolution XPS scans of the (a) C 1s and (b) N 1s electrons of NCF.
